# Supplementary material
Source: Springer Nature journal article supplement (https://www.springermedizin.de/resource/supplementary/12906_2012_1150_MOESM2_ESM.pdf/9520002)

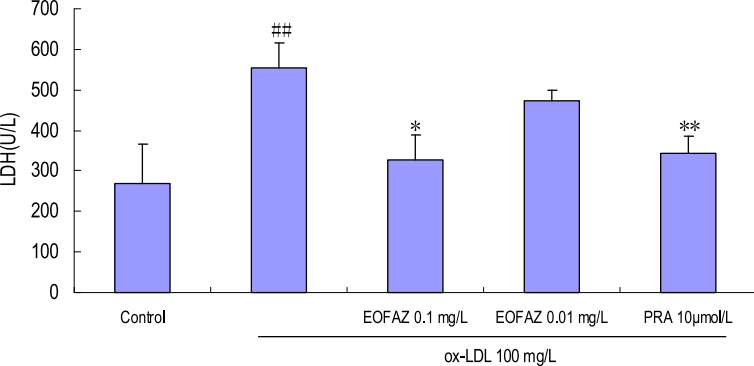

Supplement: MOESM2 [file 9520002]
